# Supplementary material
Source: PubMed Central journal article supplement (PMC7098787)
Supplement: jciinsight-5-132836-s241.pdf [file jciinsight-5-132836-s241.pdf]

## Supplementary data for

### Targeting IL-17A/glucocorticoid synergy on CSF3 expression in neutrophilic airway diseases

Suidong Ouyang<sup>1,2</sup>, Caini Liu<sup>1,2</sup>, Jianxin Xiao<sup>1</sup>, Xing Chen<sup>1</sup>, Andy C. Lui<sup>1</sup> and Xiaoxia Li<sup>1,3</sup>

<sup>1</sup>Inflammation and Immunity, Cleveland Clinic, 9500 Euclid Ave., Cleveland, OH 44195, USA.

<sup>2</sup>These authors contribute to the work equally.

<sup>3</sup>Corresponding author. Email: [lix@ccf.org](mailto:lix@ccf.org) (X.L.)

#### The file includes:

**Supplementary Figure 1.** Glucocorticoid differentially regulates IL-17A-induced neutrophil-promoting cytokines in mASMCs and mouse fibroblasts.

**Supplementary Figure 2.** DEX and TNF do not stabilize CSF3 mRNA.

**Supplementary Figure 3.** Low-dose DEX inhibits type-2 eosinophilic airway inflammation but promotes type-17 neutrophilic airway inflammation in HDM-induced allergic asthma models.

**Supplementary Figure 4.** CSF3 levels in lung tissues correlate with BAL neutrophil counts in DEX-treated mice on HDM-CFA type-17 acute asthma model.

**Supplementary Figure 5.** Inflammatory gene expression in lung tissues of mice treated by DEX, anti-IL-17A, and anti-CSF3, alone or in combination in HDM-CFA type-17 acute asthma model.

**Supplementary Figure 6.** Inflammatory gene expression in lung tissues of mice treated by DEX, C3G, alone or in combination in HDM-CFA type-17 acute asthma model.

**Supplementary Figure 7.** Depletion IL-17A and neutrophils alleviates airway inflammation and remodeling in mice on HDM-CFA type-17 chronic asthma model.

**Supplementary Figure 8.** Gating strategy for lung neutrophils.

## A mASMC

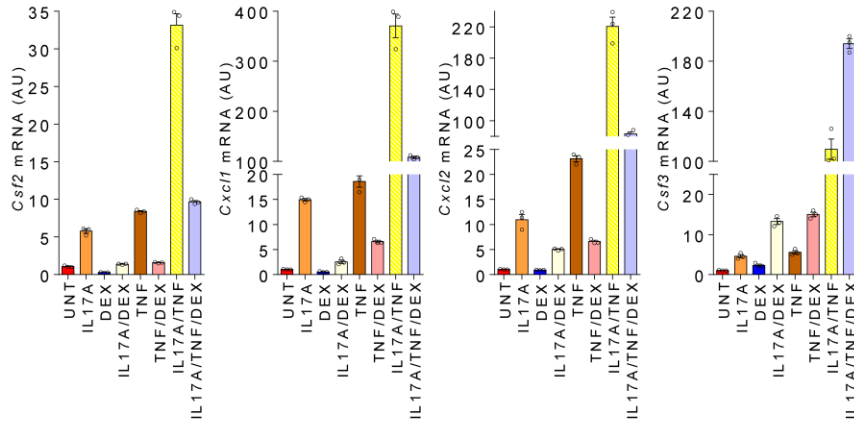

## B

### Mouse lung fibroblasts

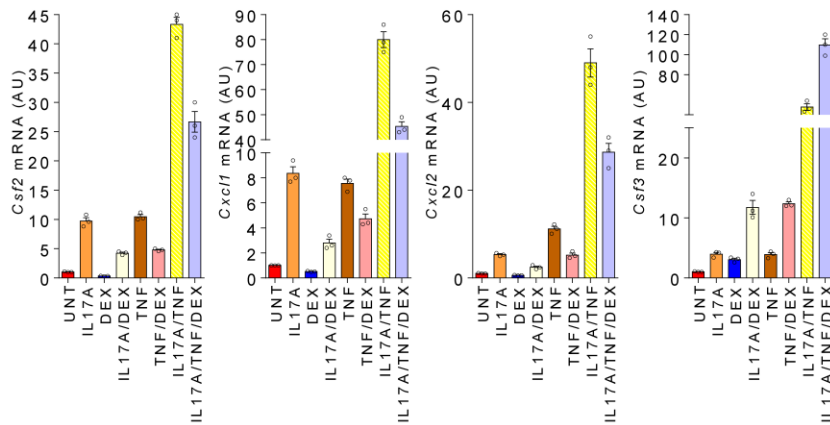

**Supplementary Figure 1. Glucocorticoid differentially regulates IL-17A-induced neutrophil-promoting cytokines in mASMCs and lung fibroblasts.** Real-time PCR analysis of mRNA expression of indicated cytokines in mASMCs (A) and mouse lung fibroblasts (B). Cells were untreated (UNT) or treated for 4 h as indicated: PBS (UNT), IL-17A (100 ng/ml), DEX (1  $\mu$ M), TNF (10 ng/ml). Data represent mean  $\pm$  SD (n=3 technical replicates). All data are representative of three independent experiments.

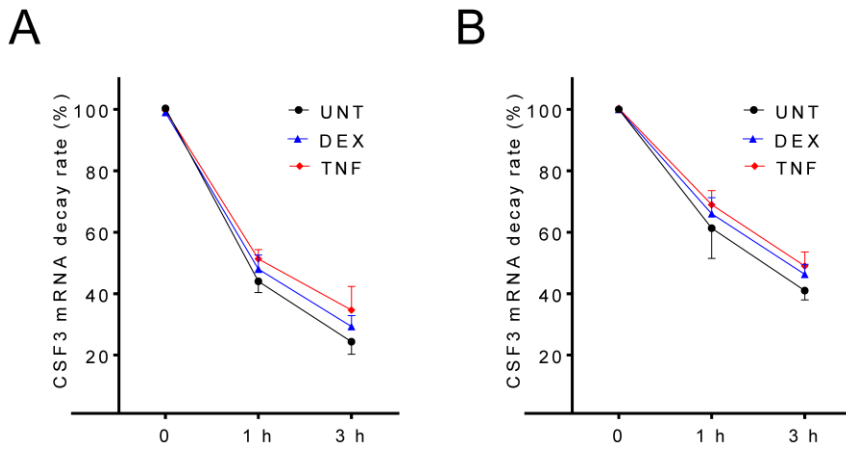

**Supplementary Figure 2. DEX and TNF do not stabilize CSF3 mRNA.** mRNA degradation assay. hASMCs were pretreated with medium (**A**) or IL-17A (**B**) for 4 h, followed by treatment with Actinomycin D (5  $\mu$ g/ml) in the absence and presence of DEX or TNF (10 ng/ml). mRNA decay rate was measured as a ratio (percentage) of remaining mRNA at indicated time point to the amount of mRNA at time point 0. Data represent mean  $\pm$  SEM (n=3 biological replicates). All data are representative of two independent experiments.

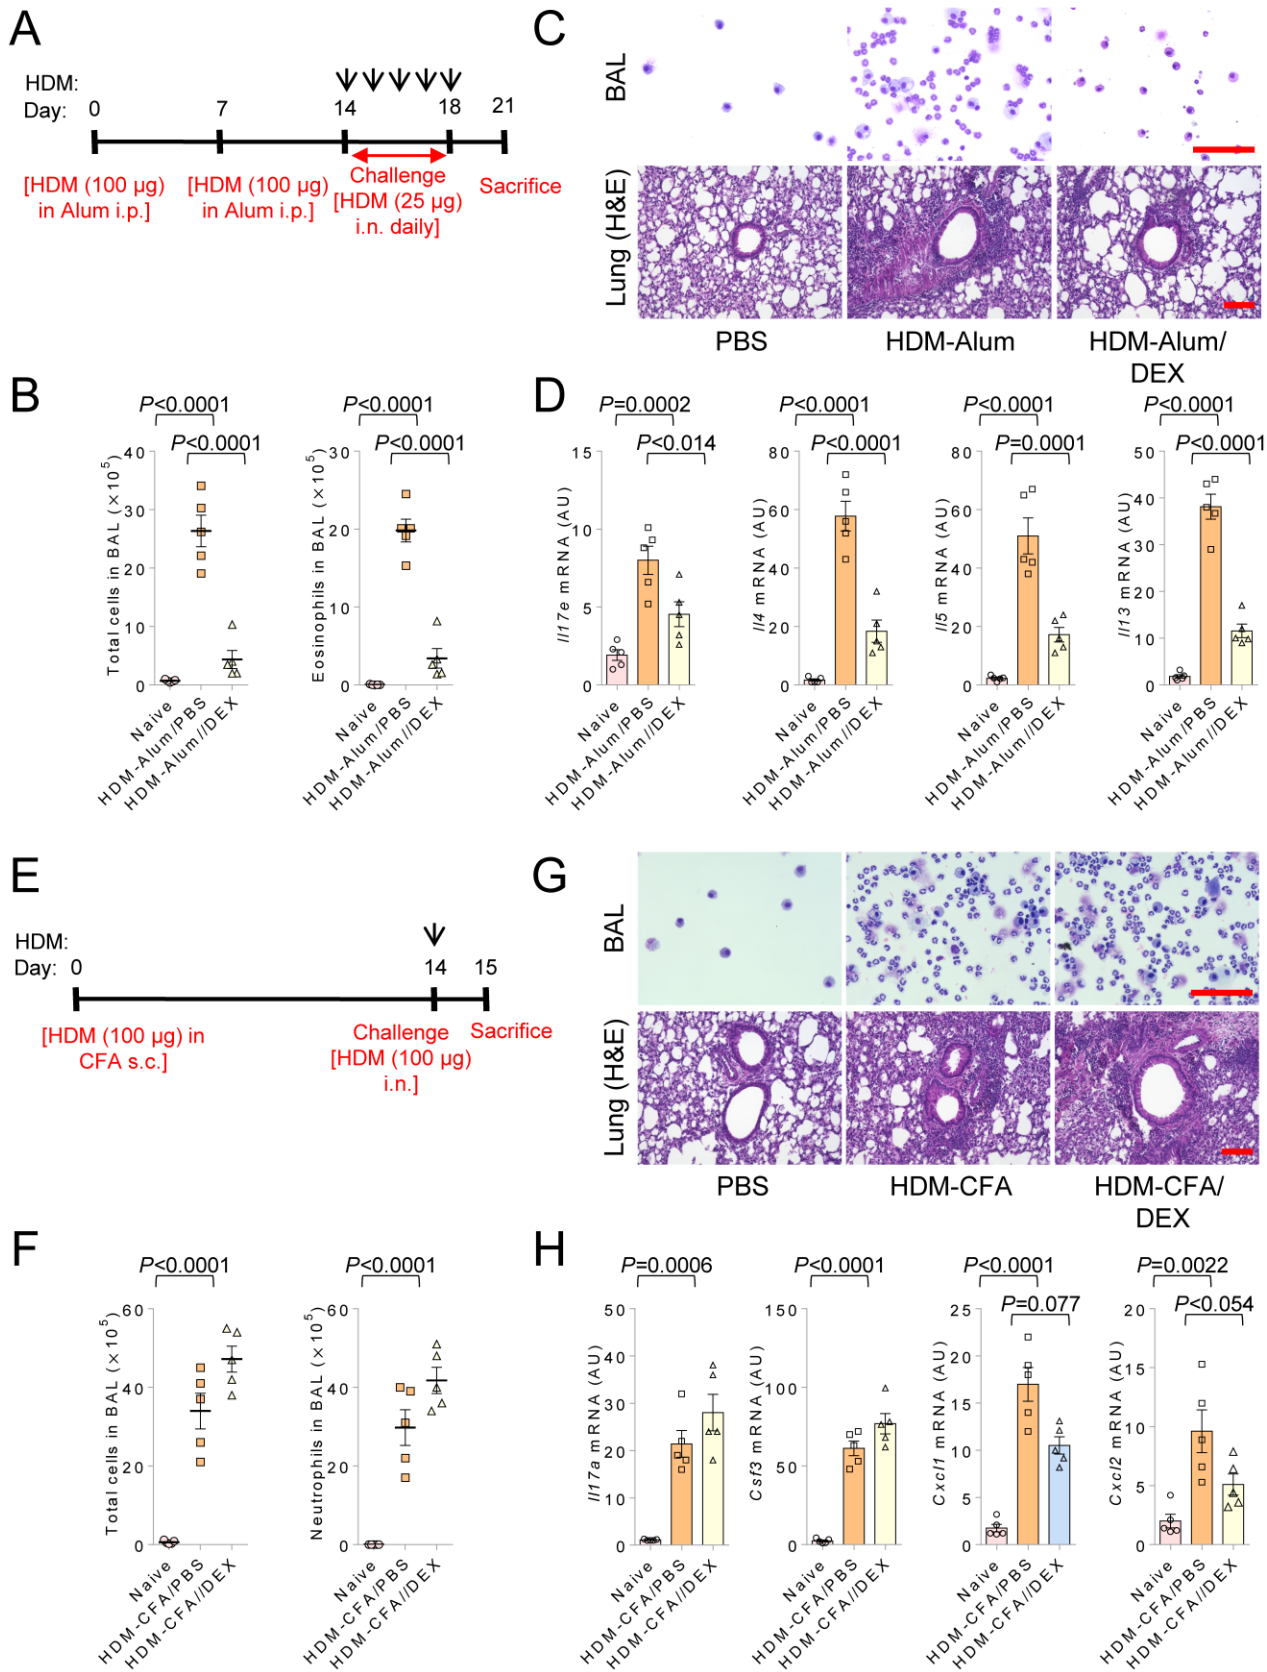

**Supplementary Figure 3. Low-dose DEX inhibits type-2 eosinophilic airway inflammation but promotes type-17 neutrophilic airway inflammation in HDM-induced allergic asthma models. (A)** Eight-week WT C57BL/6 female mice were subjected to HDM-Alum type-2 asthma model (n = 5 per group). PBS (control) or

DEX (0.3 mg/kg BW) was administrated into the mice (as described in Materials and Methods). Twenty-four hours after challenging, total and eosinophil counts in the BAL were quantified **(B)**. Representative BAL cells were prepared by cytopsin and lung tissues were subjected to H&E staining **(C)**. **(D)** mRNA expression of lung tissues was quantified by real-time PCR. **(E)** Eight-week WT C57BL/6 female mice were subjected to HDM-CFA type-17 acute asthma model (n = 5 per group). PBS (Control) or DEX (0.3 mg/kg BW) was administrated into the mice (as described in Materials and Methods). Twenty-four hours after challenging, total and neutrophil counts in the BAL were quantified **(F)**. Representative BAL cells were prepared by cytopsin and lung tissues were subjected to H&E staining **(G)**. **(H)** mRNA expression of lung tissues was quantified by real-time PCR. Data represent mean  $\pm$  SEM. One-way ANOVA was performed, followed by Tukey's multiple comparison test. The multiplicity adjusted P values were calculated for the indicated comparisons. The above data are representative of three independent experiments.

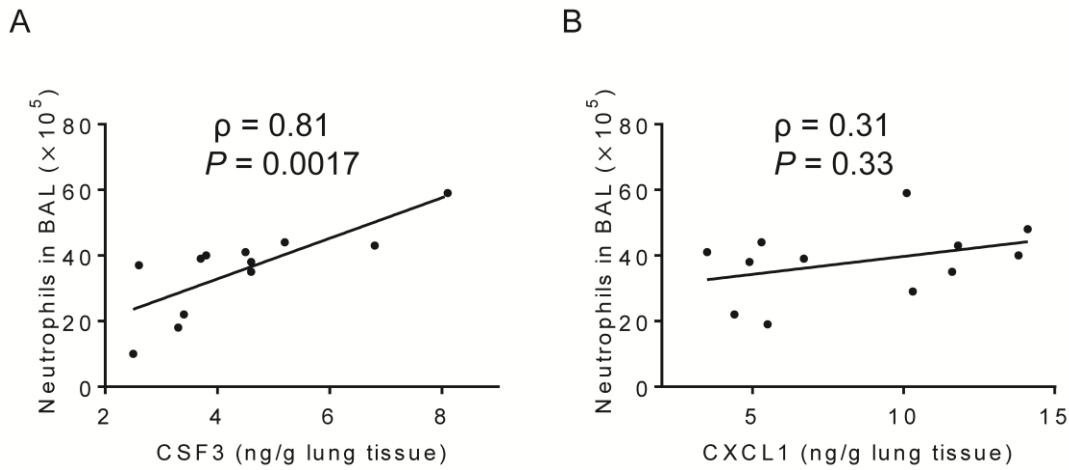

**Supplementary Figure 4. CSF3 levels in lung tissues correlate with BAL neutrophil counts in DEX-treated mice on HDM-CFA type-17 acute asthma model.** Eight-week WT C57BL/6 female mice were subjected to HDM-CFA type-17 acute asthma model (n = 12). DEX (0.3 mg/kg BW) was administered into the mice (as described in Materials and Methods). **(A)** Correlation between the levels of CSF3 in lung tissues and neutrophil counts in BAL. **(B)** Correlation between the levels of CXCL1 in lung tissues and neutrophil counts in BAL.  $\rho =$  Spearman's rank correlation coefficient.

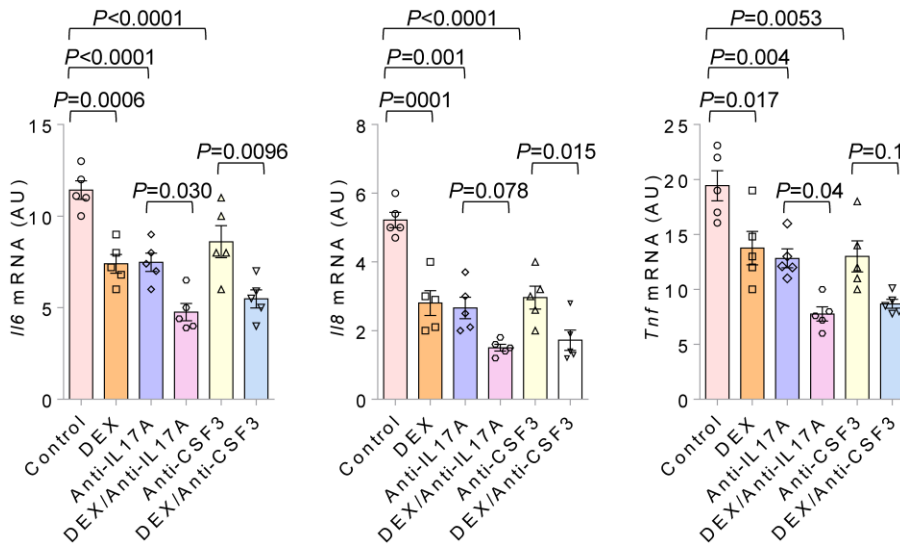

**Supplementary Figure 5. Inflammatory gene expression in lung tissues of mice treated by DEX, anti-IL-17A, and anti-CSF3, alone or in combination in HDM-CFA type-17 acute asthma model.** Eight-week WT C57BL/6 female mice (n = 5 per group) were subjected to HDM-CFA type-17 acute severe asthma model and treated as described in Figure 2. AU, fold induction relative to unchallenged control mice. Data represent mean  $\pm$  SEM. One-way ANOVA was performed, followed by Tukey's multiple comparison test. The multiplicity adjusted P values were calculated for the indicated comparisons. The above data are representative of three independent experiments.

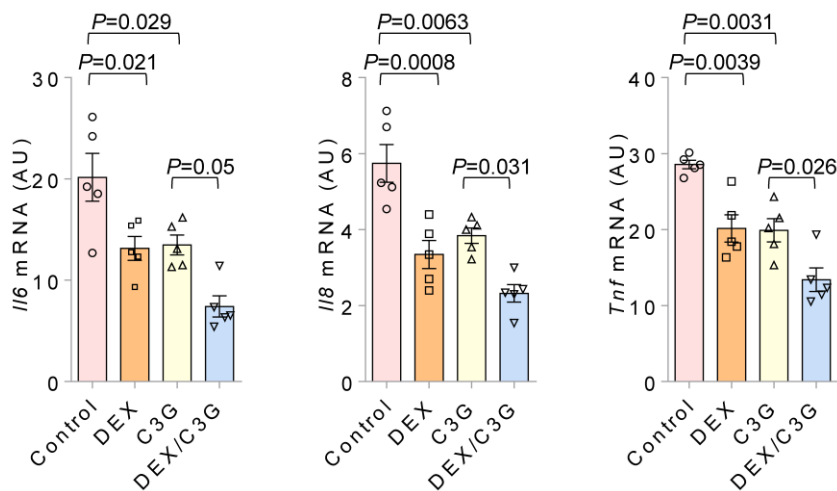

**Supplementary Figure 6. Inflammatory gene expression in lung tissues of mice treated by DEX, C3G, alone or in combination in HDM-CFA type-17 acute asthma model.** Eight-week WT C57BL/6 female mice ( $n = 5$  per group) were subjected to HDM-CFA type-17 acute severe asthma model and treated as described in Figure 3. AU, fold induction relative to unchallenged control mice. Data represent mean  $\pm$  SEM. One-way ANOVA was performed, followed by Tukey's multiple comparison test. The multiplicity adjusted P values were calculated for the indicated comparisons. The above data are representative of three independent experiments.



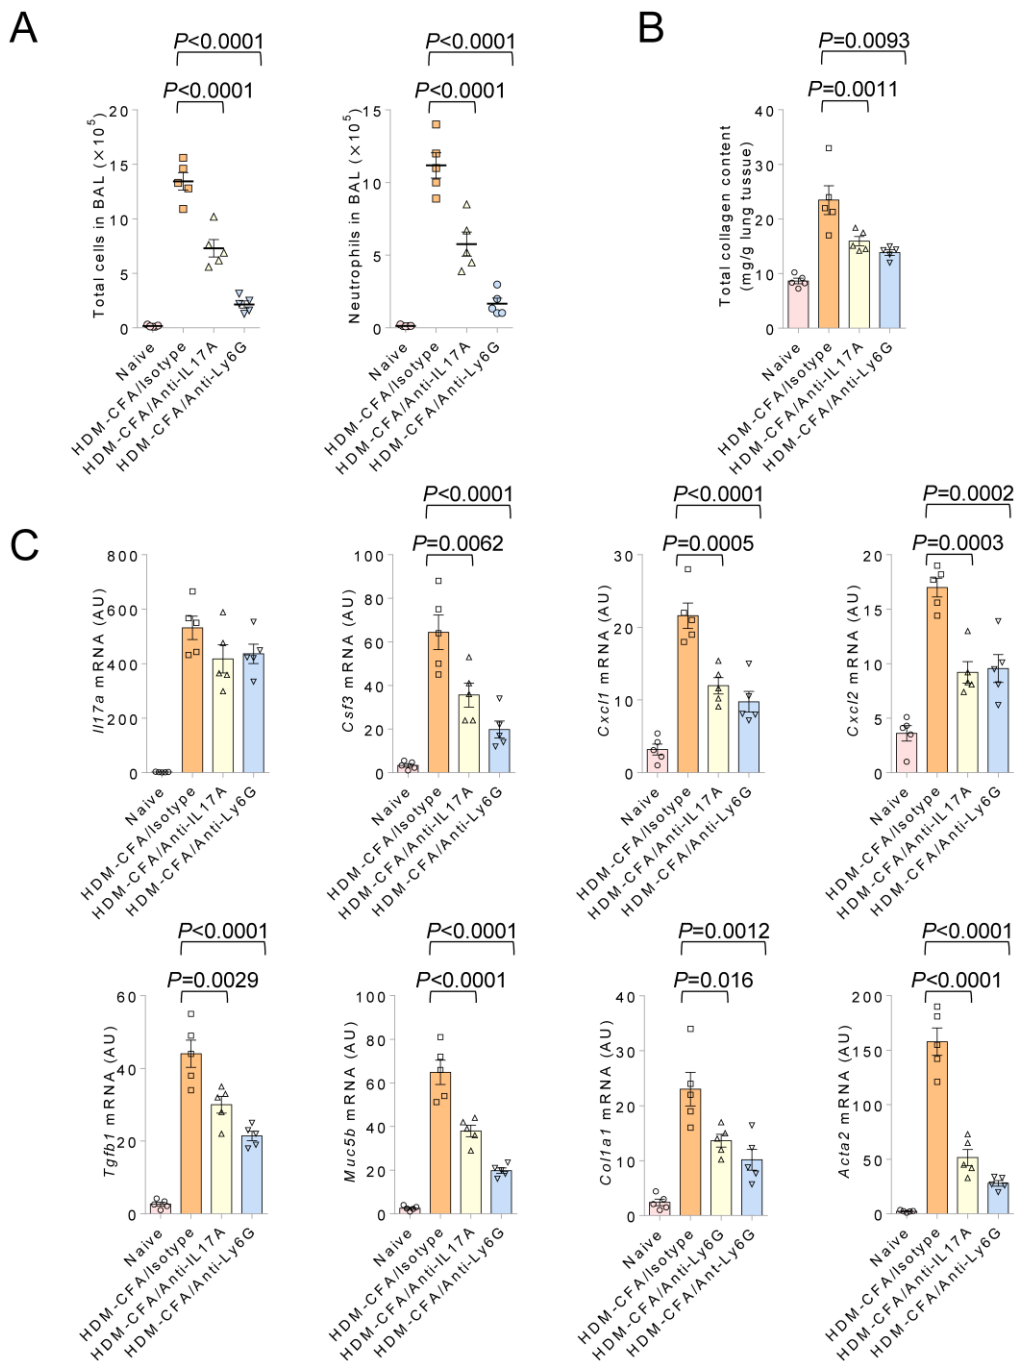

**Supplementary Figure 7. Depletion IL-17A and neutrophils alleviates airway inflammation and remodeling in HDM-CFA type-17 chronic asthma** Eight-week WT C57BL/6 female mice were subjected to HDM-CFA type-17 chronic asthma model ( $n = 5$  per group). Isotype control, anti-IL17A or anti-Ly6G antibodies were administrated into the mice (as described in Materials and Methods). Twenty-four hours after last challenging, total and neutrophil counts in the BAL (**A**) and total collagen content in lung tissue (**B**) were quantified. (**C**) mRNA expression of lung tissues was quantified by RT-PCR. Data represent mean  $\pm$  SEM. One-way ANOVA was performed, followed by Tukey's multiple comparison test. The multiplicity adjusted P values

were calculated for the indicated comparisons. The above data are representative of three independent experiments.

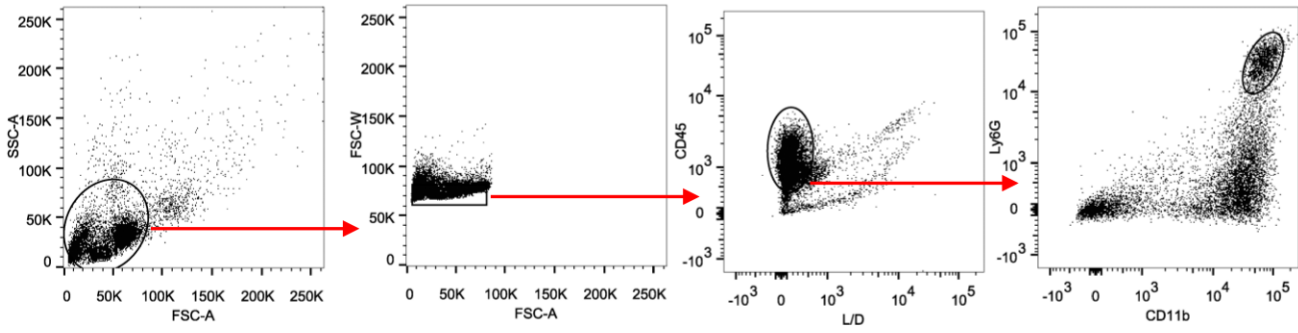

**Supplementary Figure 8. Gating strategy for lung neutrophils.** Lung cells were stained with anti-CD45, anti-CD11b and anti-Ly6G antibodies, followed by tunnel assay using biotinylated dNTP and streptavidin-FITC as shown in Figure. 6C. The neutrophils were gated as CD45<sup>+</sup>CD11b<sup>+</sup>Ly6G<sup>+</sup> cells. L/D, live/dead dye (Zombie NIR™).
